# Supplementary material for: High-performance monolayer Na3Sb shrinking transistors: a DFT-NEGF study
Source: Royal Society of Chemistry journal article supplement (doi:10.1039/d0nr04129g), 2020-01-01
Supplement: d0nr04129g1.pdf [file d0nr04129g1.pdf]

## **High-performance Monolayer Na<sub>3</sub>Sb Shrinking Transistors: A DFT-NEGF Study**

Wenhan Zhou,<sup>a</sup> Shengli Zhang,<sup>\*a</sup> Shiyong Guo,<sup>a</sup> Hengze Qu,<sup>a</sup> Bo Cai,<sup>a</sup> Xiang Chen,<sup>a</sup> and Haibo Zeng<sup>\*a</sup>

<sup>a</sup>Key Laboratory of Advanced Display Materials and Devices, Ministry of Industry and Information Technology, College of Material Science and Engineering, Nanjing University of Science and Technology, Nanjing 210094, P. R. China

\*Authors to whom correspondence should be addressed: zhangslvip@njust.edu.cn and zeng.haibo@njust.edu.cn

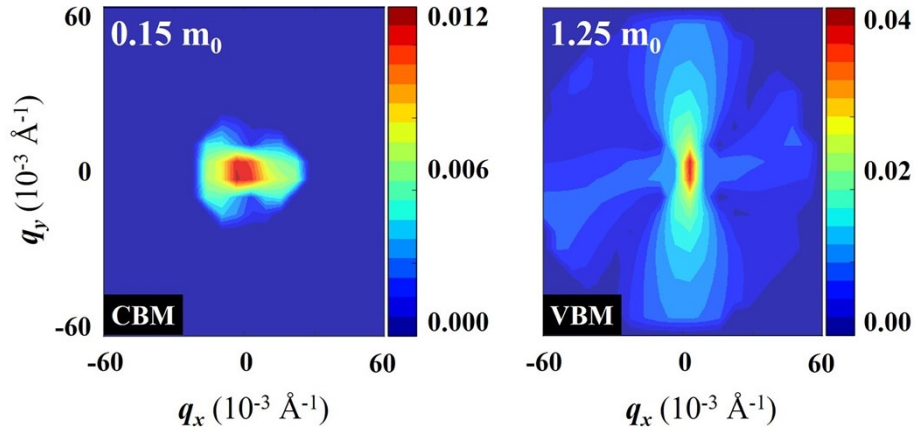

Fig. S1. Matrix elements of electron-phonon interaction in monolayer Na<sub>3</sub>Sb. The interaction is illustrated as a function of the phonon wave vector  $q$  for  $k$  at the CBM and VBM  $k$ -points.

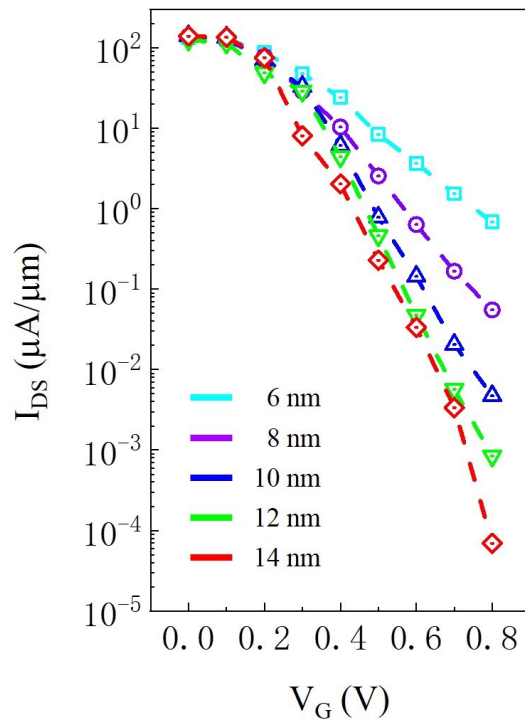

Fig. S2. Transfer characteristics of the p-type Na<sub>3</sub>Sb FETs for different channel lengths.

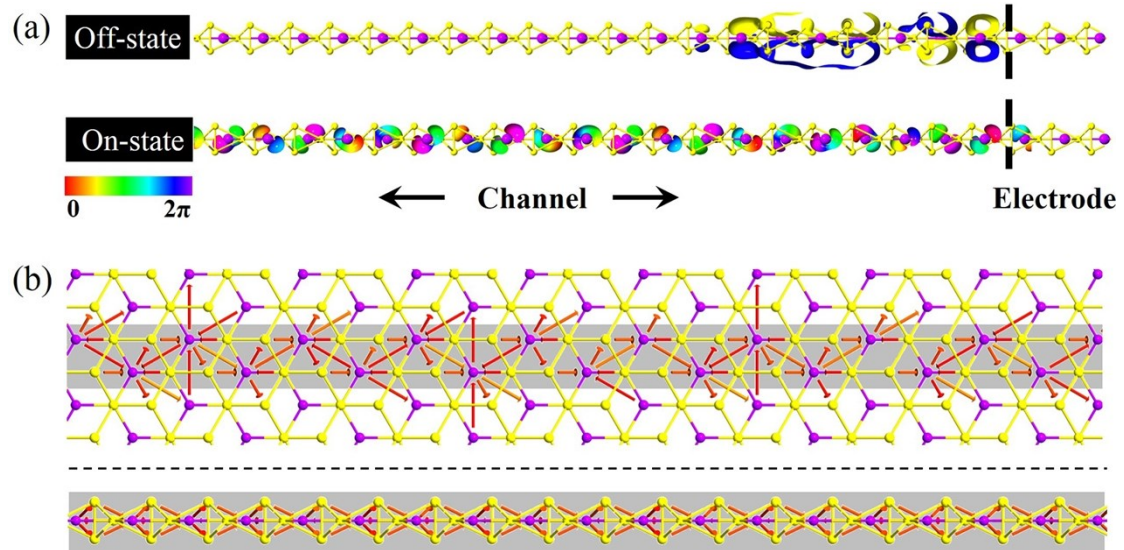

Fig. S3 (a) Transmission eigenstates of the  $\text{Na}_3\text{Sb}$  FETs at the off and on state. (b) Top and side view for transmission pathway of the  $\text{Na}_3\text{Sb}$  FETs at the on state.
